# Supplementary material for: Photothermal and robust supramolecular soft material crosslinked via dinuclear heterodentate coordination
Source: Royal Society of Chemistry journal article supplement (doi:10.1039/d4mh01733a), 2025-01-01
Supplement: d4mh01733a1.pdf [file d4mh01733a1.pdf]

## Supporting Information

### Photothermal and Robust Supramolecular soft material Cross-Linked by Dinuclear Heterodentate Coordination

Huijuan Lu,<sup>ab</sup> Haohan Tong,<sup>ab</sup> Bingbing Gao,<sup>ab</sup> Jingyi Zhu<sup>d</sup> and Shuidong Zhang<sup>\*c</sup>

#### Supplementary Figures

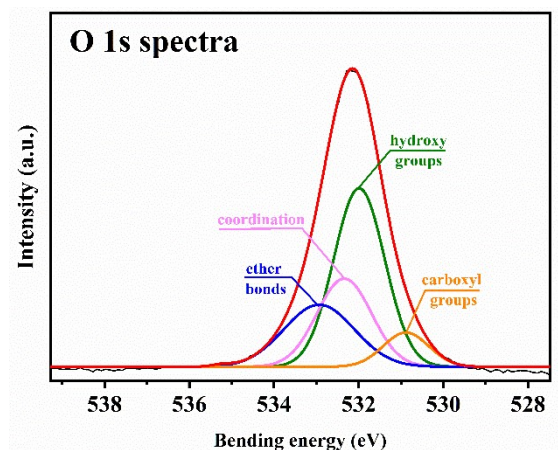

Fig. S1 High-resolution O 1s XPS spectra of XNBR/22.5OCTS-27/5Fe<sup>3+</sup>/4Cu<sup>2+</sup>. The red line was the global envelope used to fit the XPS spectra.

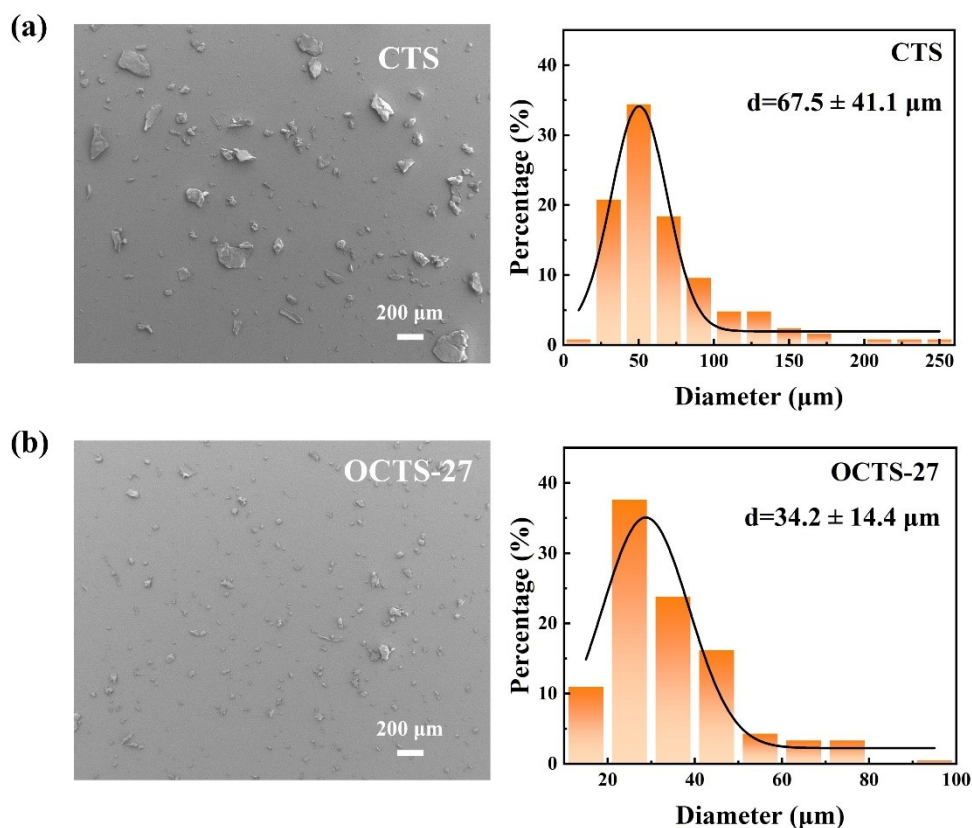

Fig. S2 Particle size and its distribution of a) CTS and b) OCTS-27.

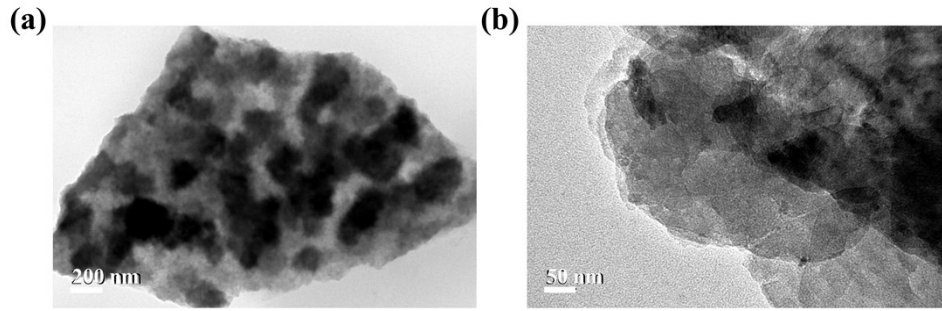

Fig. S3 a) TEM image and b) HRTEM image of XNBR/OCTS/Fe<sup>3+</sup>/Cu<sup>2+</sup>.

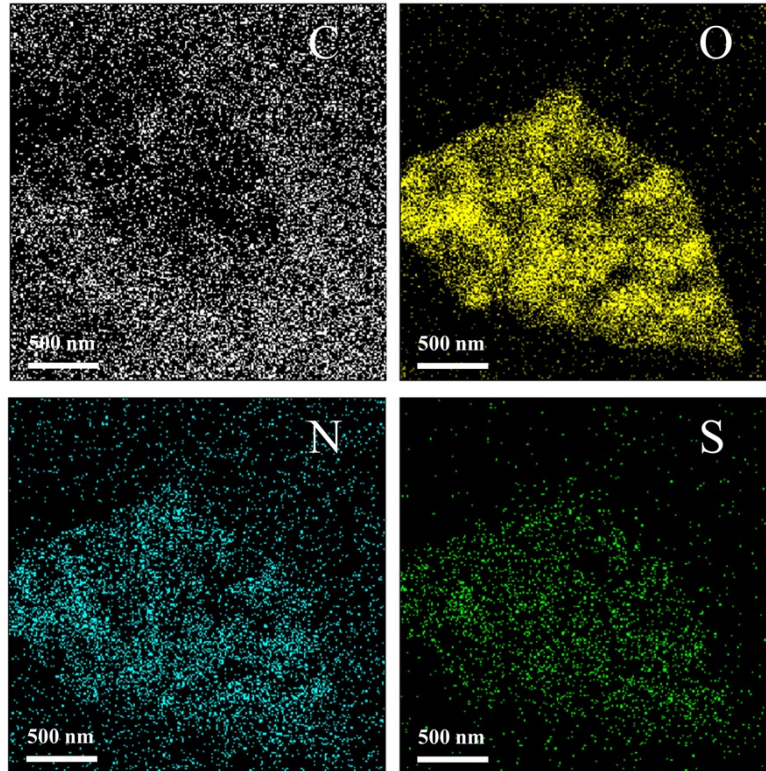

Fig. S4 Element mapping images of XNBR/22.5OCTS-27/5Fe<sup>3+</sup>/4Cu<sup>2+</sup>: C, O, N, and S.

Table S1 Comparison of mechanical properties between our work and those reported in literature

| Material system                              | Tensile strength (MPa) | Elongation at break (%) | Ref.      |
|----------------------------------------------|------------------------|-------------------------|-----------|
| NR/ZDMA/CNC                                  | 4.13                   | 430                     | 1         |
| S-MXenes/S-ENR                               | 4.55                   | 388                     | 2         |
| Ti <sub>3</sub> C <sub>2</sub> MXene/ENR     | 4.93                   | 1042                    | 3         |
| XNBR-API/Zn <sup>2+</sup>                    | 6.8                    | 2435                    | 4         |
| PMVS-COOH/PDMS-OH/TAPS                       | 1.4                    | 152                     | 5         |
| ENR/D/Fe <sup>3+</sup>                       | 7.4                    | 930                     | 6         |
| XNBR/TEA/Dy <sup>3+</sup>                    | 4.5                    | 2375                    | 7         |
| XNBR/OCTS/Fe <sup>3+</sup> /Cu <sup>2+</sup> | 12.7                   | 955                     | This work |

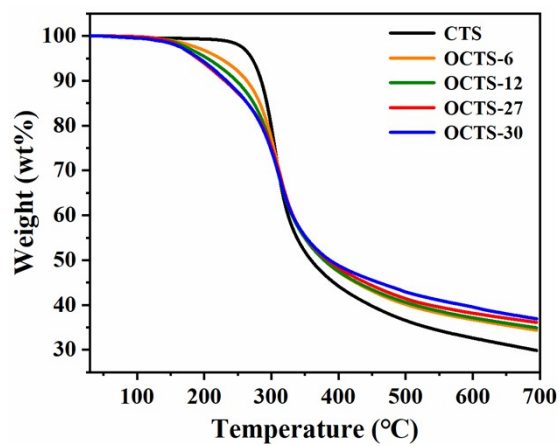

Fig. S5 TG curves of CTS and OCTS.

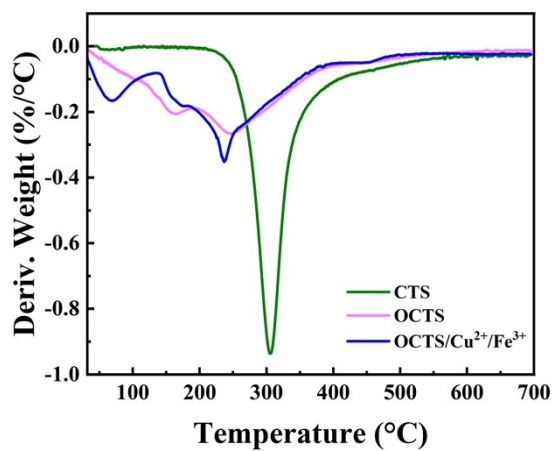

Fig. S6 DTG curves of CTS, OCTS, and OCTS/Fe<sup>3+</sup>/Cu<sup>2+</sup>.

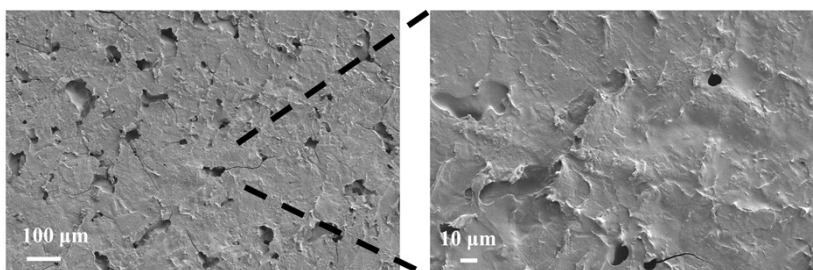

Fig. S7 SEM images of OCTS after carbonization.

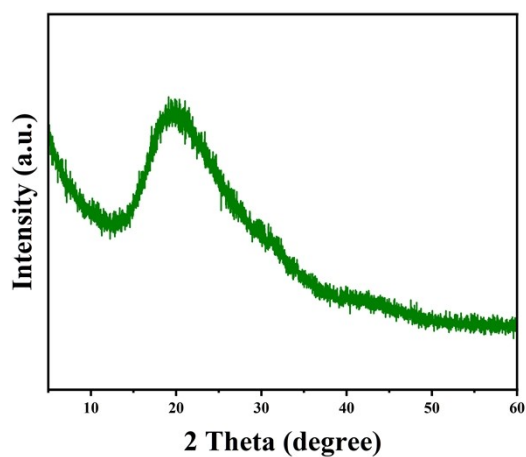

Fig. S8 XRD spectra of XNBR/OCTS/Fe<sup>3+</sup>/Cu<sup>2+</sup>.

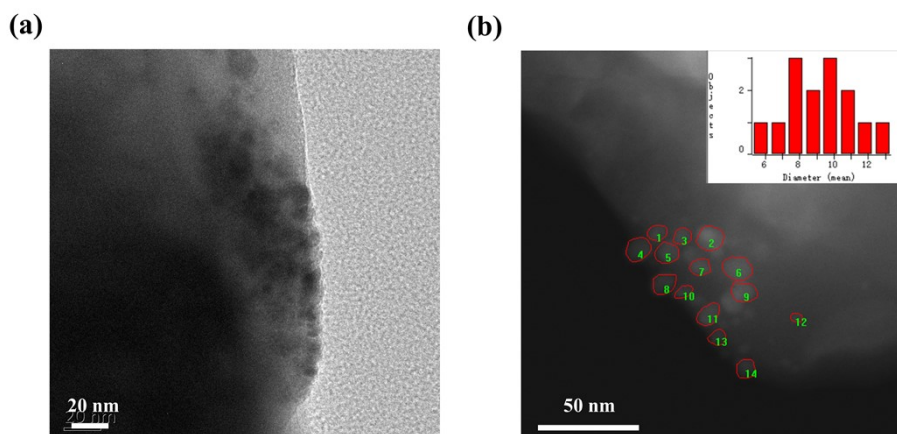

Fig. S9 a) TEM image and b) STEM-HAADF image of OCTS/Fe<sup>3+</sup>/Cu<sup>2+</sup>.

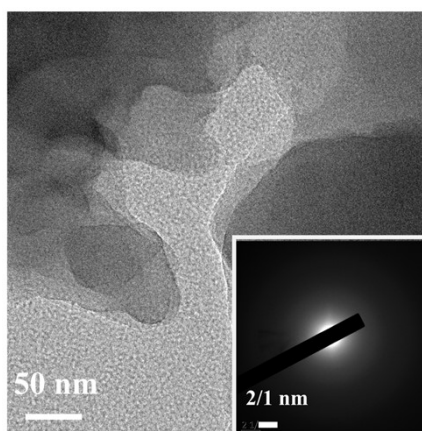

Fig. S10 TEM image of OCTS, where the white box is SAED pattern.

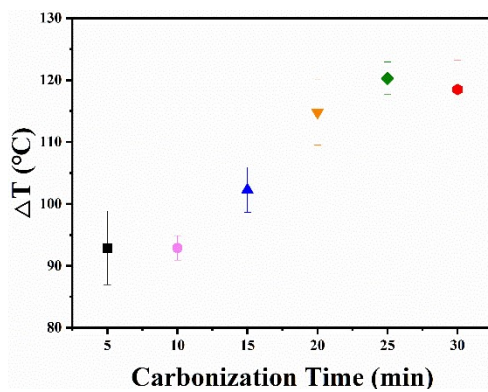

Fig. S11 One-minute irradiation warming corresponding to OCTS at different carbonization temperatures.



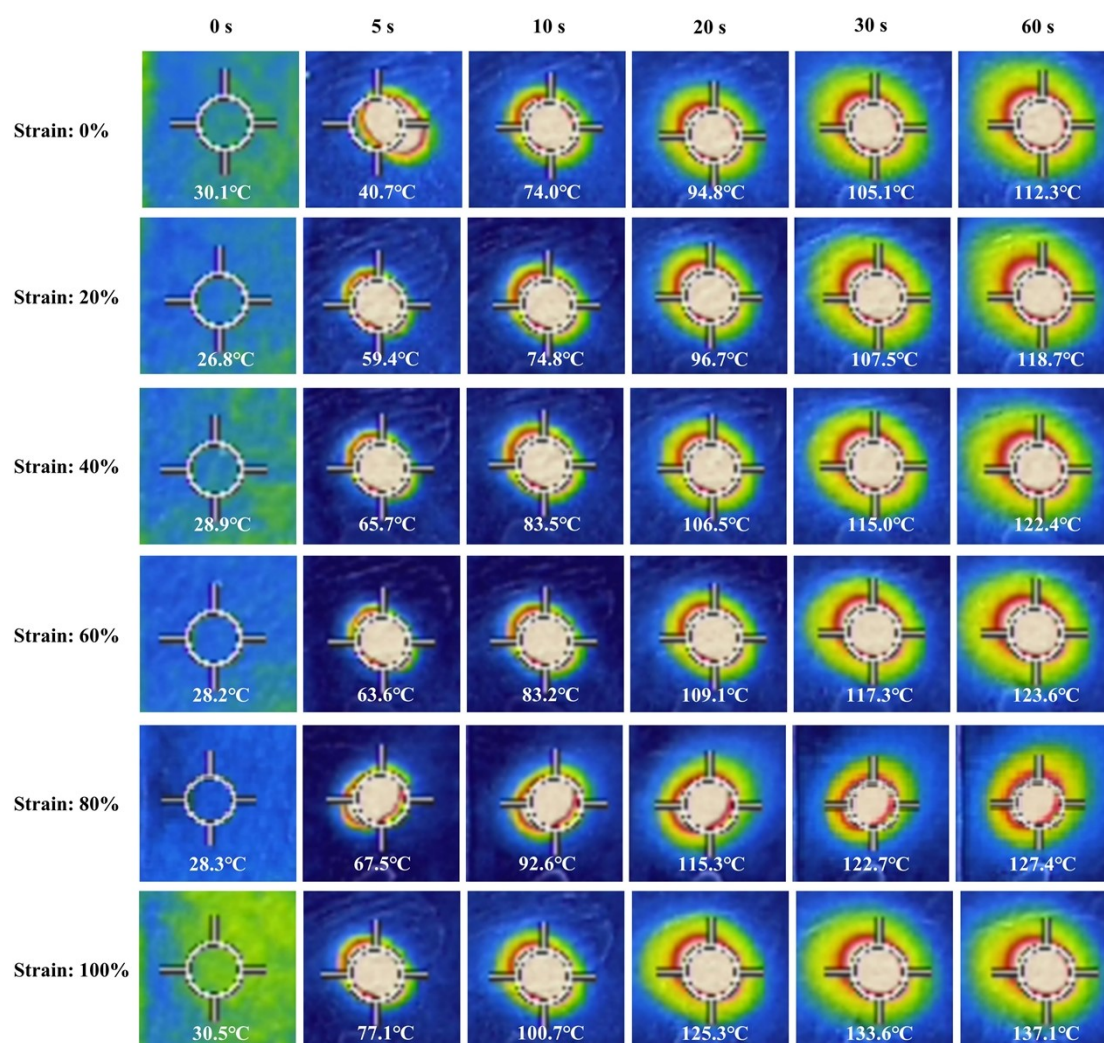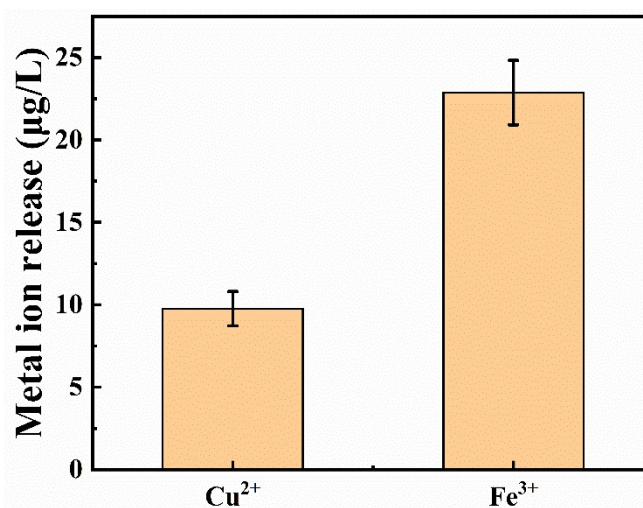

Fig. S12 IR imaging photographs of XNBR/22.5OCTS-27/5Fe<sup>3+</sup>/4Cu<sup>2+</sup> at 0-100% strain irradiated with near-infrared light.

Fig. S13 ICP-MS results of Cu and Zn ion release from XNBR/22.5OCTS-27/5Fe<sup>3+</sup>/4Cu<sup>2+</sup> incubated in phosphate-buffered saline solution (PBS, pH 7.4) at 37 °C during 24 h.

## Reference

- 1 M. Wu, L. Yang, Z. Zheng, F. Wan, X. Teng and C. Xu, *Int. J. Biol. Macromol.*, 2022, **222**, 587-598.
- 2 Q. Guo, X. Zhang, F. Zhao, Q. Song, G. Su, Y. Tan, Q. Tao, T. Zhou, Y. Yu, Z. Zhou and C. Lu, *ACS Nano*, 2020, **14**, 2788-2797.

- 3 Q. Gan, L. Song, Y. Wang, Q. Yuan, W. Huang, Y. Zhu, Y. Huang and Y. Song, *Nano Energy*, 2024, **120**, 109141.
- 4 M. Das, A. Baran Bhattacharya, A. Rahman Parathodika and K. Naskar, *Eur. Polym. J.*, 2022, **174**, 111341.
- 5 H. Sun, X. Liu, B. Yu, Z. Feng, N. Ning, G.-H. Hu, M. Tian and L. Zhang, *Polym. Chem.*, 2019, **10**, 633-645.
- 6 K. Buaksuntear, K. Panmanee, K. Wongphul, P. Lim-arun, S. Jansinak, D. U. Shah and W. Smitthipong, *Polymer*, 2024, **291**, 126626.
- 7 X. Huang, A. Zhang, Q. Tan, K. Gou, Y. Chen, Y. Nie and G. Weng, *Macromolecules*, 2024, **57**, 963-975.
